# Supplementary material
Source: publisher figshare collection journal article supplement (https://karger.figshare.com/ndownloader/files/23085239)
Supplement: Supplementary file 1 [file 23085239]

**Suppl.Fig.1** Kaplan-Meier and predicted survival plot of Cox regression. The predicted curve (predicted by the Cox regression) and observed curve (Kaplan-Meier curve) of each category of ptosis (‘No bilateral eye drop’ and ‘Bilateral eye drop’) were overlapped, which supported the proportional-hazards assumption of Cox regression.
